# Supplementary material for: First-in-human phase I study of the DNA-repair inhibitor DT01 in combination with radiotherapy in patients with skin metastases from melanoma
Source: PubMed Central journal article supplement — Br J Cancer. 2016 May 3;114(11):1199–205. doi: 10.1038/bjc.2016.120 (PMC4891504; doi:10.1038/bjc.2016.120), 2016-05-03
Supplement: bjc2016120x1.pdf [file bjc2016120x1.pdf]

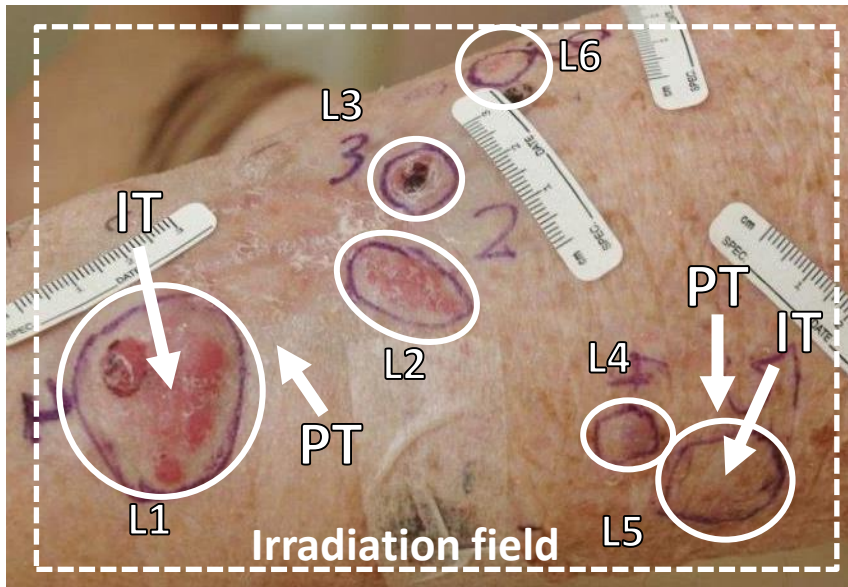

**Supplementary Figure 1. Treatment scheme.**

This picture represents an example of patient treatment. All target lesions were included in the irradiation field and received 10x3Gy over 2 weeks. Two of these (L1 and L5) were injected intratumorally (IT) and peritumorally (PT) with DT01 every other day. Arrows represent the administration sites. PT injections were administered in a clock wise manner. Circles show the assessed lesions.
